# Supplementary material
Source: MDPI journal article supplement (https://www.mdpi.com/2077-0472/14/2/246)

**Supplementary Materials**

Table S1. Chromatographic conditions of the used methods.

| Method | Compounds of interest             | Stationary phase                        | Mobile phase                                                                                                                           | Analysis                                                    | Flow (mL min <sup>-1</sup> ) | Wavelength (nm) |
|--------|-----------------------------------|-----------------------------------------|----------------------------------------------------------------------------------------------------------------------------------------|-------------------------------------------------------------|------------------------------|-----------------|
| A      | cinnamic acids, flavonols         | KINETEX—C18 column (4.6 × 150 mm, 5 µm) | A: 10 mM KH <sub>2</sub> PO <sub>4</sub> /H <sub>3</sub> PO <sub>4</sub> , pH = 2.8<br>B: CH <sub>3</sub> CN                           | gradient analysis: 5% B to 21% B in 17 min + 21% B in 3 min | 1.5                          | 330             |
| B      | benzoic acids, catechins, tannins | KINETEX—C18 column (4.6 × 150 mm, 5 µm) | A: H <sub>2</sub> O/CH <sub>3</sub> OH/HCOOH (5:95:0.1, <i>v/v/v</i> ), pH = 2.5<br>B: CH <sub>3</sub> OH/HCOOH (100:0.1, <i>v/v</i> ) | gradient analysis: 3% B to 85% B in 22 min + 85% B in 1 min | 0.6                          | 280             |

Table S2. Chromatographic fingerprint of the analysed extracts (N = 3).

| #  | Cinnamic acids |    |                  |              |               |              |              |              | Flavonols    |              |               |              |              |              |              |              |              |              |
|----|----------------|----|------------------|--------------|---------------|--------------|--------------|--------------|--------------|--------------|---------------|--------------|--------------|--------------|--------------|--------------|--------------|--------------|
|    | caffeic acid   |    | chlorogenic acid |              | coumaric acid |              | ferulic acid |              | hyperoside   |              | isoquercitrin |              | quercetin    |              | quercitrin   |              | rutin        |              |
|    | mean           | SD | mean             | SD           | mean          | SD           | mean         | SD           | mean         | SD           | mean          | SD           | mean         | S            | mean         | S            | mean         | S            |
|    | value          |    | value            |              | value         |              | value        |              | value        |              | value         |              | value        | D            | value        | D            | value        | D            |
|    | (mg/100 gDW)   |    | (mg/100 gDW)     | (mg/100 gDW) | (mg/100 gDW)  | (mg/100 gDW) | (mg/100 gDW) | (mg/100 gDW) | (mg/100 gDW) | (mg/100 gDW) | (mg/100 gDW)  | (mg/100 gDW) | (mg/100 gDW) | (mg/100 gDW) | (mg/100 gDW) | (mg/100 gDW) | (mg/100 gDW) | (mg/100 gDW) |
| 1  | n.d.           | /  | 22.66            | 1.35         | n.d.          | /            | 115.14       | 3.34         | n.d.         | /            | 38.28         | 1.27         | n.d.         | /            | n.d.         | /            | n.d.         | /            |
| 2  | n.d.           | /  | 21.11            | 2.72         | n.d.          | /            | 80.66        | 4.02         | n.d.         | /            | 44.73         | 1.67         | n.d.         | /            | n.d.         | /            | n.d.         | /            |
| 3  | n.d.           | /  | 21.25            | 1.08         | n.d.          | /            | 116.34       | 3.54         | n.d.         | /            | 42.41         | 2.05         | n.d.         | /            | n.d.         | /            | n.d.         | /            |
| 4  | n.d.           | /  | 17.40            | 1.57         | n.d.          | /            | 112.32       | 2.47         | n.d.         | /            | 52.09         | 1.80         | n.d.         | /            | n.d.         | /            | n.d.         | /            |
| 5  | n.d.           | /  | 18.08            | 1.81         | n.d.          | /            | 111.41       | 3.20         | n.d.         | /            | 67.00         | 1.75         | n.d.         | /            | n.d.         | /            | n.d.         | /            |
| 6  | n.d.           | /  | 18.76            | 1.62         | n.d.          | /            | 117.73       | 4.34         | n.d.         | /            | 60.47         | 1.72         | n.d.         | /            | n.d.         | /            | n.d.         | /            |
| 7  | n.d.           | /  | 13.02            | 1.71         | n.d.          | /            | 90.57        | 3.37         | n.d.         | /            | 41.42         | 2.17         | n.d.         | /            | n.d.         | /            | n.d.         | /            |
| 8  | n.d.           | /  | 15.15            | 2.48         | n.d.          | /            | 96.52        | 3.50         | n.d.         | /            | 57.09         | 3.13         | n.d.         | /            | n.d.         | /            | n.d.         | /            |
| 9  | n.d.           | /  | 13.68            | 2.29         | n.d.          | /            | 101.76       | 3.04         | n.d.         | /            | 51.94         | 2.35         | n.d.         | /            | n.d.         | /            | n.d.         | /            |
| 10 | n.d.           | /  | 19.95            | 1.85         | n.d.          | /            | 111.34       | 1.68         | n.d.         | /            | 50.25         | 4.64         | n.d.         | /            | n.d.         | /            | n.d.         | /            |

| Benzoic acids |    |             |    | Catechins |    |             |    | Tannins    |    |            |    |
|---------------|----|-------------|----|-----------|----|-------------|----|------------|----|------------|----|
| ellagic acid  |    | gallic acid |    | catechin  |    | epicatechin |    | castalagin |    | vescalagin |    |
| mean          |    | mean        |    | mean      |    | mean        |    | mean       |    | mean       |    |
| value         | SD | value       | SD | value     | SD | value       | SD | value      | SD | value      | SD |

| # | (mg/100 gDW) |     |
|---|--------------|-----|--------------|-----|--------------|-----|--------------|-----|--------------|-----|--------------|-----|
| 1 | 10.85        | 0.9 | 7            | 0.2 | 16.82        | 2.1 | 0            | 4.4 | 18.61        | 1.6 | 73.99        | 4.8 |
| 2 | 21.10        | 1.0 | 3            | 0.1 | 23.11        | 1.2 | 2            | 2.3 | 61.57        | 1.1 | 68.98        | 1.8 |
| 3 | 27.62        | 1.1 | 0            | 0.2 | 30.07        | 1.9 | 6            | 4.4 | 33.28        | 2.4 | 48.72        | 3.9 |
| 4 | 24.55        | 1.4 | 9            | 0.1 | 32.00        | 2.2 | 1            | 3.7 | 21.01        | 3.9 | 64.95        | 4.0 |
| 5 | 11.55        | 0.9 | 2            | 0.3 | 41.45        | 1.6 | 4            | 3.7 | 77.61        | 2.0 | 62.39        | 4.4 |
| 6 | 12.45        | 0.9 | 0            | 0.2 | 31.69        | 2.1 | 0            | 2.3 | 80.88        | 2.8 | 56.21        | 4.6 |
| 7 | 9.44         | 1.2 | 4            | 0.0 | 46.44        | 3.1 | 7            | 2.3 | 47.10        | 4.0 | 39.33        | 2.9 |
| 8 | 11.48        | 1.1 | 4            | 0.1 | 31.90        | 1.8 | 8            | 2.6 | 56.45        | 4.8 | 54.88        | 2.1 |
| 9 | 11.23        | 1.0 | 9            | 0.1 | 41.79        | 4.5 | 5            | 2.0 | 55.68        | 1.7 | 74.83        | 3.7 |
| 1 | 14.77        | 0.4 | 1            | 0.1 | 40.35        | 2.6 | 2            | 1.3 | 62.78        | 1.8 | 66.78        | 3.1 |
| 0 |              |     |              |     |              |     |              |     |              |     |              |     |

SD = standard deviation; DW = dried weight.

Figure S1: The results of the PCA performed on the set of variables.

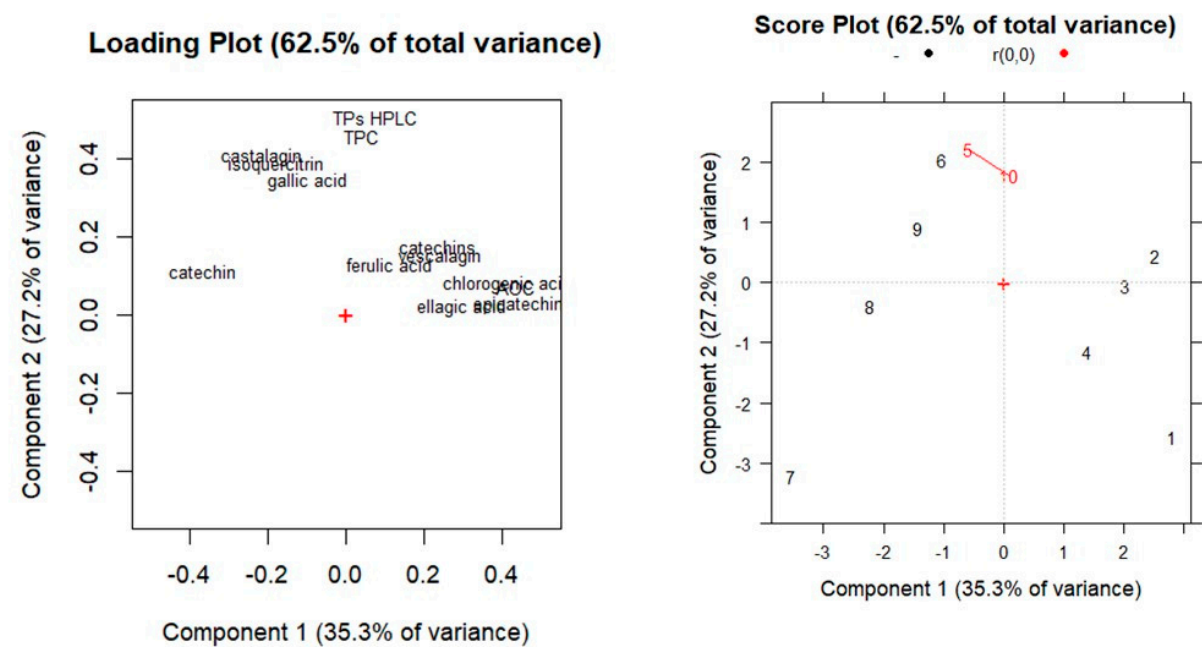

Supplement: s1 [file s1]
